# Supplementary material for: Enhanced chitosan–DNA interaction by 2-acrylamido-2-methylpropane coupling for an efficient transfection in cancer cells
Source: Royal Society of Chemistry journal article supplement (doi:10.1039/c4tb02070g), 2015-01-01
Supplement: c4tb02070g1.pdf [file c4tb02070g1.pdf]

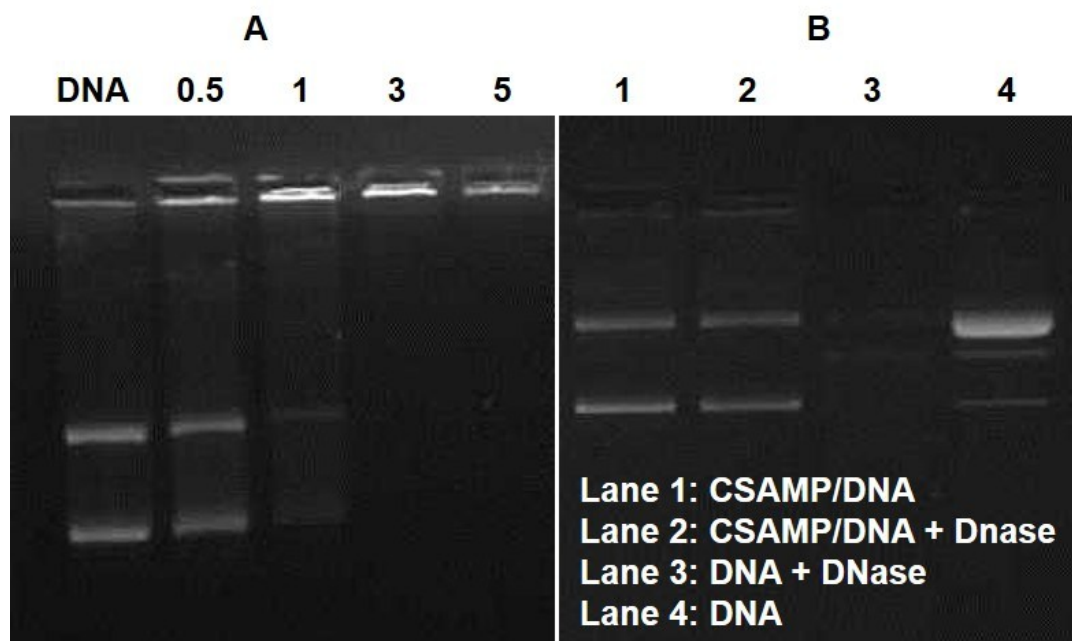

Supplementary Fig. 1 (a) Gel electrophoresis of pGL3/CSAMP (0.1  $\mu$ g) complexes at various w/w ratios of pGL3 to CSAMP (gel Lane 1 to 5: Naked pGL3, 1 : 0.5, 1 : 1, 1 : 3 and 1 : 5), (j) protection and release assay. pGL3 was released by adding 1% SDS to pGL3/CSAMP complexes at a w/w ratio of 1 : 5, (Lane 1) pGL3/CSAMP without DNase I, (Lane 2) pGL3/CSAMP complexes with DNase I, (Lane 3) pGL3 with DNase I, and (Lane 4) naked pGL3

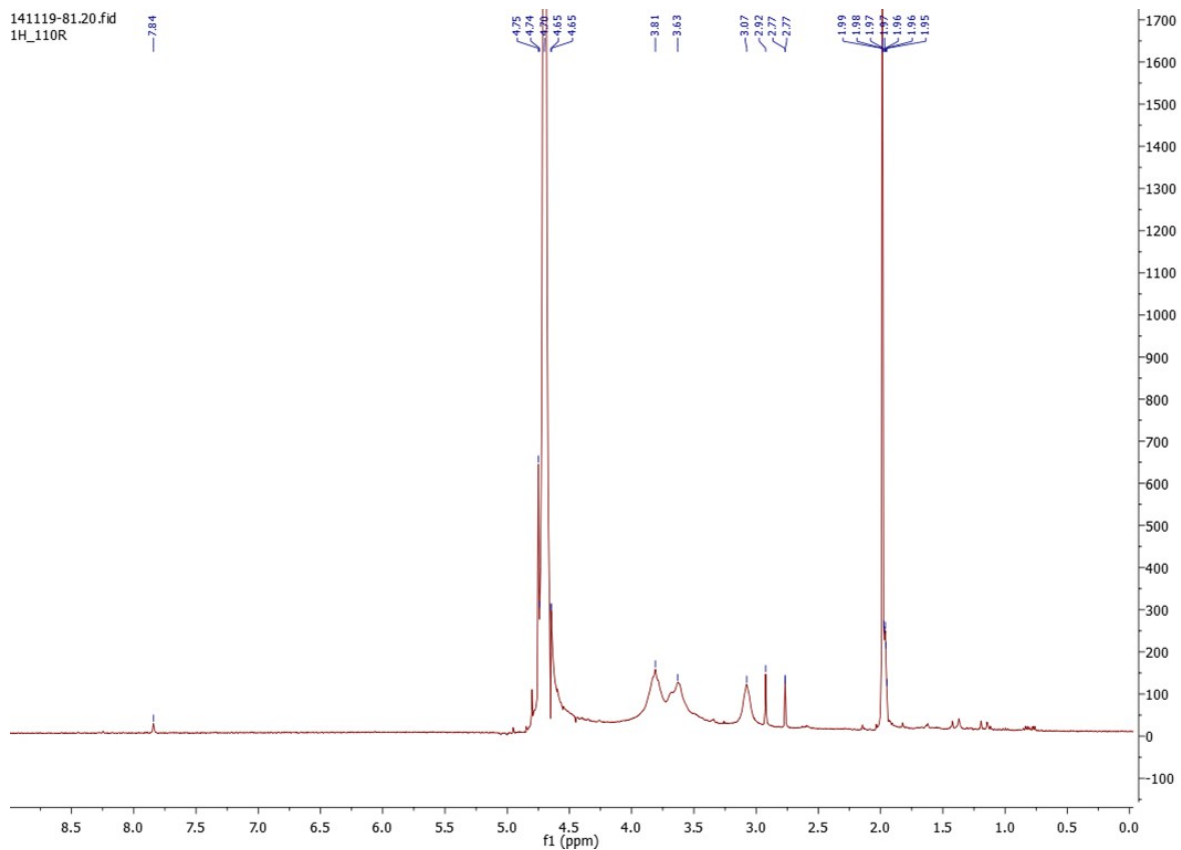

Supplementary Fig. 2 <sup>1</sup>H NMR of CSAMP
